# Supplementary material for: Thrombin Generation Is Associated With Extracellular Vesicle and Leukocyte Lipid Membranes in Atherosclerotic Cardiovascular Disease
Source: PubMed Central journal article supplement (PMC11335086; doi:10.1161/atvbaha.124.320902), 2024-08-01
Supplement: atv-44-2038-s002.pdf [file atv-44-2038-s002.pdf]

## SUPPLEMENTAL MATERIALS

### **Thrombin generation is associated with extracellular vesicle and leukocyte lipid membranes in atherosclerotic cardiovascular disease.**

Majd B Protty<sup>1\*</sup>, Victoria J Tyrrell<sup>1</sup>, Keith Allen-Redpath<sup>2</sup>, Shin Soyama<sup>2</sup>, Ali A Hajeyah<sup>1</sup>, Daniela Costa<sup>1</sup>, Anirban Choudhury<sup>3</sup>, Rito Mitra<sup>4</sup>, Amal Sharman<sup>2</sup>, Parveen Yaqoob<sup>2</sup>, P Vince Jenkins<sup>1</sup>, Zaheer Yousef<sup>4</sup>, Peter W Collins<sup>1</sup> and Valerie B O'Donnell<sup>1\*</sup>

<sup>1</sup> Systems Immunity University Institute, Cardiff University, Cardiff, CF14 4XN, UK

<sup>2</sup> Department of Nutritional Sciences, University of Reading, Reading, RG6 6AP, UK

<sup>3</sup> Morriston Cardiac Centre, Swansea Bay University Health Board, Swansea, SA6 6NL, UK

<sup>4</sup> Department of Cardiology, University Hospital of Wales, Cardiff, CF14 4XW, UK

## Supplementary Figures and Tables.

### Supplementary Figure Legends.

**Figure S1. The experimental design of studies of arterial thrombosis in the clinical cohort.** Patients were recruited as described in Methods. Blood was taken in a clinical area, and was transferred immediately to the laboratory. Platelets, leukocytes and extracellular vesicles (EV) were separated as described in Methods. The cells were divided into fractions to undergo functional testing with prothrombinase assay and lipid extraction and processing with LC/MS/MS, as outlined in Methods.

**Figure S2. The workflow of the prothrombinase assay used to determine the procoagulant potential of washed cells and extra-cellular vesicles.** In step 1, a known number of cells (platelets, leukocytes or EV) was aliquoted into a 96-well half-area plate. In step 2, a coagulation factor mixture containing calcium, FII, FXa, FVa was added to the plate to start the prothrombinase reaction on the surface of cells. The reaction was allowed to proceed for 5 min (step 3), before being quenched with EDTA (step 4). The amount of thrombin (FIIa) made was quantified using a p-nitroaniline (pNA) containing chromogenic substrate S-2238 and absorbance read (405 nm) and compared to a standard curve of human thrombin (step 5).

**Figure S3. LC/MS/MS chromatograms of biotinylated-PS molecular species.** Representative chromatograms from participant samples are shown for the PS molecular species quantified with the QTrap 4000 as in Methods. MRM transition and lipid name are displayed at the top of the chromatogram panels. These represent typical signals obtained from experiments performed.

**Figure S4. LC/MS/MS chromatograms of biotinylated-PE molecular species.** Representative chromatograms from participant samples are shown for the PE molecular species quantified with the QTrap 4000 as in Methods. MRM transition and lipid name are displayed at the top of the chromatogram. These represent typical signals obtained from experiments performed.

**Figure S5: EV preparation is not contaminated with lipoproteins and lipoproteins elute later than EV during SEC, while lipoproteins isolated by density gradient centrifugation elute from SEC in later fractions, separate from EV.** *Panel A: EV preparation is not contaminated with lipoproteins.* Paired samples of double-spun plasma or EV-rich fractions from healthy volunteers as described in Methods were analyzed for the presence of Apolipoprotein B (ApoB) using an ELISA kit (Abcam, UK) (marker for low density lipoproteins), n=3, mean +/- SEM. *Panels B,C: Chylomicrons (ApoB 48) and VLDL (ApoE 100) elute later than EV during SEC.* Platelet free plasma (PFP) was subject to SEC, and elution of ApoB 48 and ApoB 100 monitored using ELISAs as outlined in Supplementary Data (n = 2, mean +/- SD). *Panels D,E,F. Density gradient isolated lipoproteins elute later than EV during SEC.* Lipoproteins (chylomicrons, VLDL-1 and VLDL-2) were isolated using density gradient centrifugation. They were then subject to SEC to determine their elution profile (n = 12, mean +/- SEM).

**Figure S6. Significantly smaller EV particles (diameter) are detected in CAD patient plasma, and a downward trend in RF and ACS patients was seen, compared with healthy controls.** Platelet-free plasma (0.5 ml) from each participant was processed through size exclusion chromatography (iZON qEV columns) and nanoparticle tracking analysis (Nanosight 300), as in Methods. Data for size was plotted as a box plot with the ggplot2 R package. Statistical significance was tested with one way ANOVA and Tukey Post Hoc test (\*: p <0.05, \*\*: p <0.01, \*\*\*: p <0.001). ACS: acute coronary syndrome (n=24), CAD: coronary artery disease but no ACS (n=19), RF: Risk factors with no significant coronary artery disease (n=23), HC: Healthy control (n=22).

**Figure S7. Characterization of aminophospholipid species in EV from a clinical cohort of patients with arterial thrombosis shows overall similar amounts of externalized aPL between clinical groups.** *Panel A: The amounts of externalized aPL species in EV samples were largely similar between clinical groups.* Using EV samples isolated from plasma, the amounts of externalized PS and PE species for each of the clinical groups as quantified by LC/MS/MS were plotted to examine for differences between groups. *Panel B: The amounts of total aPL species in EV samples were elevated in the CAD group.* The

amounts of total PS and PE species as quantified by LC/MS/MS for each of the clinical groups were plotted to examine for differences between groups. Lipids were extracted from EV-rich plasma fractions as in Methods. Lipid amounts (ng) were calculated by LC/MS/MS. Statistical significance was tested with one way ANOVA and Tukey Post Hoc test (\*:  $p < 0.05$ , \*\*:  $p < 0.01$ , \*\*\*:  $p < 0.001$ ). Externalized: ACS: acute coronary syndrome (n=21), CAD: coronary artery disease but no ACS (n=19), RF: Risk factors with no significant coronary artery disease (n=22), HC: Healthy control (n=23). Total: ACS: acute coronary syndrome (n=19), CAD: coronary artery disease but no ACS (n=18), RF: Risk factors with no significant coronary artery disease (n=17), HC: Healthy control (n=23).

**Figure S8. Thrombin generation correlated with external PS in EV samples, but no correlation was seen with externalized aPL in resting platelets and leukocytes, and the prothrombinase assay is not affected by aspirin.** The ability of EV (A), resting leukocyte (B) and resting platelet (C) membranes to support thrombin generation was assessed using the prothrombinase assay and correlated with externalized PS and PE amounts quantified by LC/MS/MS using Pearson's correlation (n=85). Lipids were extracted as in Materials and Methods. Lipids amounts (ng) were calculated by LC/MS/MS. Statistical significance was tested with Pearson's correlation. *Panel D: Prothrombinase activity on platelets is not affected by aspirin.* The prothrombinase assay was carried out, as described in Methods, on washed platelets from healthy volunteers (n=3) in the presence or absence of 1mM aspirin. Data presented as mean +/- SEM.

**Figure S9. Characterization of aminophospholipid species in leukocytes from a clinical cohort of patients with arterial thrombosis shows largely similar profile of aPL lipids across clinical groups.** *Panel A: Leukocytes externalize aPL molecular species upon ionophore-activation.* Using washed leukocytes (resting and ionophore activated), the amounts of externalized PS and PE species for each of the clinical groups as quantified by LC/MS/MS were plotted to examine for differences between groups. *Panel B: Minimal differences in the amounts of total aPL molecular species between clinical groups are seen.* The amounts of total PS and PE species for each of the clinical groups were quantified by LC/MS/MS to examine for differences between groups. Lipids were extracted from washed leukocytes as in Materials and Methods. Lipids amounts (ng) were calculated by LC/MS/MS. Statistical significance was tested with one way ANOVA and Tukey Post Hoc test (\*:  $p < 0.05$ , \*\*:  $p < 0.01$ , \*\*\*:  $p < 0.001$ ). Externalized: ACS: acute coronary syndrome (n=21), CAD: coronary artery disease but no ACS (n=19), RF: Risk factors with no significant coronary artery disease (n=22), HC: Healthy control (n=23). Total: ACS: acute coronary syndrome (n=19), CAD: coronary artery disease but no ACS (n=18), RF: Risk factors with no significant coronary artery disease (n=17), HC: Healthy control (n=23).

**Figure S10: Characterization of aminophospholipid species in platelets from a clinical cohort of patients with arterial thrombosis shows a similar profile of aPL externalization between ACS and HC samples.** *Panel A: Thrombin-activation increased aPL externalization on the surface of platelets with minimal differences between clinical groups.* Externalized PS and PE species were quantified in platelets (resting or thrombin-activated) by LC/MS/MS for each of the clinical groups, and plotted to examine for differences between groups. *Panel B: Quantification of Total aPL species detected in platelet membranes showed minimal differences between ACS and HC.* The amounts of total PS and PE for each clinical group was plotted to examine for differences between groups. Lipids were extracted from washed platelets as in Materials and Methods. Lipids amounts (ng) were calculated by LC/MS/MS. Statistical significance was tested using one way ANOVA and Tukey Post Hoc test (\*:  $p < 0.05$ , \*\*:  $p < 0.01$ , \*\*\*:  $p < 0.001$ ). Externalized: ACS: acute coronary syndrome (n=21), CAD: coronary artery disease but no ACS (n=19), RF: Risk factors with no significant coronary artery disease (n=22), HC: Healthy control (n=23). Total: ACS: acute coronary syndrome (n=19), CAD: coronary artery disease but no ACS (n=18), RF: Risk factors with no significant coronary artery disease (n=17), HC: Healthy control (n=23).

**Figure S11: D-Dimer or TAT levels were similar for all groups and no correlation with thrombin generation on EV, platelets or leukocytes was seen.** *Panel A: D-Dimer was measured from stored plasma samples from all participants using a human D-Dimer ELISA kit (Abcam, UK) and plotted on a box plot.* *Panel B: TATs were measured in stored plasma samples from all participants using a human TAT ELISA kit (Abcam, UK) and plotted on a box plot.* *Panel C: Correlation plot of D-Dimer and TAT in all*

participants. D: Correlation plot between D-Dimer or TATs and thrombin generation data from EV, platelets and leukocytes. Statistical significance was tested with Pearson's correlation or one way ANOVA and Tukey Post Hoc test (\*: p <0.05, \*\*: p <0.01, \*\*\*: p <0.001). ACS: acute coronary syndrome (n=24), CAD: coronary artery disease but no ACS (n=19), RF: Risk factors with no significant coronary artery disease (n=23), HC: Healthy control (n=24), TAT: Thrombin Anti-thrombin.

**Figure S12: D-Dimer or TATs did not correlate with aPL amounts in EV or leukocytes.** D-Dimer and TATs were measured in stored plasma samples from all participants using ELISA (Abcam, UK) and correlated with aPL amounts from EV and leukocytes and displayed as correlation plots. Statistical significance was tested with Pearson's correlation (\*: p <0.05, \*\*: p <0.01, \*\*\*: p <0.001). TAT: Thrombin Anti-thrombin (n=85).

**Figure S13: D-Dimer or TATs did not correlated with aPL amounts in platelets.** D-Dimer and TATs were measured in stored plasma samples from all participants using ELISA (Abcam, UK) and correlated with aPL amounts from platelets and displayed as correlation plots. Statistical significance was tested with Pearson's correlation (\*: p <0.05, \*\*: p <0.01, \*\*\*: p <0.001). TAT: Thrombin Anti-thrombin (n=85).

| Variable                                  | Healthy control (HC) (n=24) | Risk-factor matched (RF) (n=23) | Significant coronary artery disease (CAD) (n=19) | Acute coronary syndrome (ACS) (n=24) | p      |
|-------------------------------------------|-----------------------------|---------------------------------|--------------------------------------------------|--------------------------------------|--------|
| Age, Mean ± SD                            | 64.92 ± 10.79               | 61.43 ± 8.16                    | 64.53 ± 9.65                                     | 64.67 ± 9.88                         | 0.473  |
| Male Sex (%)                              | 14 (58.3)                   | 12 (52.2)                       | 16 (84.2)                                        | 17 (70.8)                            | 0.133  |
| Creatinine µmol/L, Mean ± SD              | -                           | 77.57 ± 12.60                   | 88.39 ± 31.95                                    | 84.79 ± 18.64                        | 0.318  |
| Haemoglobin g/dL, Mean ± SD               | -                           | 146.04 ± 13.03                  | 138.24 ± 17.95                                   | 144.46 ± 18.88                       | 0.380  |
| Platelets x 10 <sup>9</sup> /L, Mean ± SD | -                           | 250.26 ± 44.01                  | 261.94 ± 56.08                                   | 271.50 ± 82.72                       | 0.869  |
| WCC x 10 <sup>9</sup> /L, Mean ± SD       | -                           | 6.96 ± 1.57                     | 7.92 ± 1.92                                      | 9.28 ± 2.90                          | 0.011  |
| Neutrophils                               | -                           | 4.33 ± 1.17                     | 5.02 ± 1.32                                      | 6.51 ± 2.49                          | 0.003  |
| Eosinophils                               | -                           | 0.19 ± 0.09                     | 0.25 ± 0.12                                      | 0.11 ± 0.08                          | <0.001 |
| Basophils                                 | -                           | 0.02 ± 0.04                     | 0.03 ± 0.05                                      | 0.00 ± 0.02                          | 0.098  |
| Lymphocytes                               | -                           | 1.82 ± 0.68                     | 1.89 ± 0.70                                      | 1.85 ± 0.71                          | 0.818  |
| Monocytes                                 | -                           | 0.57 ± 0.19                     | 0.68 ± 0.21                                      | 0.73 ± 0.32                          | 0.150  |
| RBC x 10 <sup>12</sup> /L, Mean ± SD      | -                           | 4.80 ± 0.42                     | 4.14 ± 1.26                                      | 4.64 ± 0.54                          | 0.090  |
| Aspirin use (%)                           | 0 (0)                       | 20 (87)                         | 14 (73.7)                                        | 24 (100)                             | 0.017  |
| P2Y12 inhibitor use (%)                   | 0 (0)                       | 3 (13)                          | 6 (31.6)                                         | 24 (100)                             | <0.001 |
| Anticoagulant use (%)                     | 0 (0)                       | 3 (13)                          | 0 (0)                                            | 24 (100)                             | -      |
| Statin use (%)                            | 0 (0)                       | 15 (65.2)                       | 15 (78.9)                                        | 19 (79.2)                            | 0.532  |
| Hypertension (%)                          | 0 (0)                       | 13 (56.5)                       | 13 (68.4)                                        | 11 (45.8)                            | 0.350  |
| Diabetes (%)                              | 0 (0)                       | 7 (30.4)                        | 3 (15.8)                                         | 6 (25)                               | 0.554  |
| Smoker (%)                                | 0 (0)                       | 7 (30.4)                        | 9 (47.4)                                         | 13 (54.2)                            | 0.244  |
| CKD (%)                                   | 0 (0)                       | 0 (0)                           | 3 (15.8)                                         | 3 (12.5)                             | -      |

**Table S1. Baseline clinical characteristics of patients recruited in the clinical cohort.** (WCC: white cell count, RBC: red blood cell count, P2Y12 inhibitors: clopidogrel, prasugrel or ticagrelor, CKD: chronic

kidney disease, SD: standard deviation, p-value tests: Fisher exact (categorical) or Kruskal-Wallis (continuous), p-value comparators: all clinical groups (age, sex) or all except HC for other variables).

| Analyte                | Mass | Biotinylated mass | $m/z$ [M-H] <sup>-</sup> | Biotinylated MRM transition | DP (V) | CE (V) | CXP (V) |
|------------------------|------|-------------------|--------------------------|-----------------------------|--------|--------|---------|
| PE 14:0_14:0 (DMPE)    | 635  | 861               | 860                      | 860→227                     | -135   | -60    | -13     |
| PS 14:0_14:0 (DMPS)    | 679  | 905               | 904                      | 904→591                     | -150   | -42    | -17     |
| PE P-18:0_20:4 (SpAPE) | 751  | 977               | 976                      | 976→303                     | -160   | -60    | -5      |
| PE 18:0_20:4 (SAPE)    | 767  | 993               | 992                      | 992→303                     | -170   | -58    | -5      |
| PE P-16:0_20:4 (PpAPE) | 723  | 949               | 948                      | 948→303                     | -160   | -60    | -5      |
| PE 18:0_18:1 (SOPE)    | 745  | 971               | 970                      | 970→281                     | -170   | -58    | -5      |
| PE P-18:1_20:4 (OpAPE) | 749  | 975               | 974                      | 974→303                     | -160   | -60    | -5      |
| PS 18:0_18:1 (SOPS)    | 789  | 1,015             | 1,014                    | 1,014→701                   | -140   | -44    | -23     |
| PS 18:1_18:1 (DOPS)    | 787  | 1,013             | 1,012                    | 1,012→699                   | -150   | -46    | -23     |
| PS 18:0_20:4 (SAPS)    | 811  | 1,037             | 1,036                    | 1,036→723                   | -145   | -42    | -23     |

**Table S2. Multiple reaction monitoring (MRM) transitions for the aPL analyzed in negative ion mode as part of targeted lipidomic analysis of cells isolated from patients with atherothrombosis.**

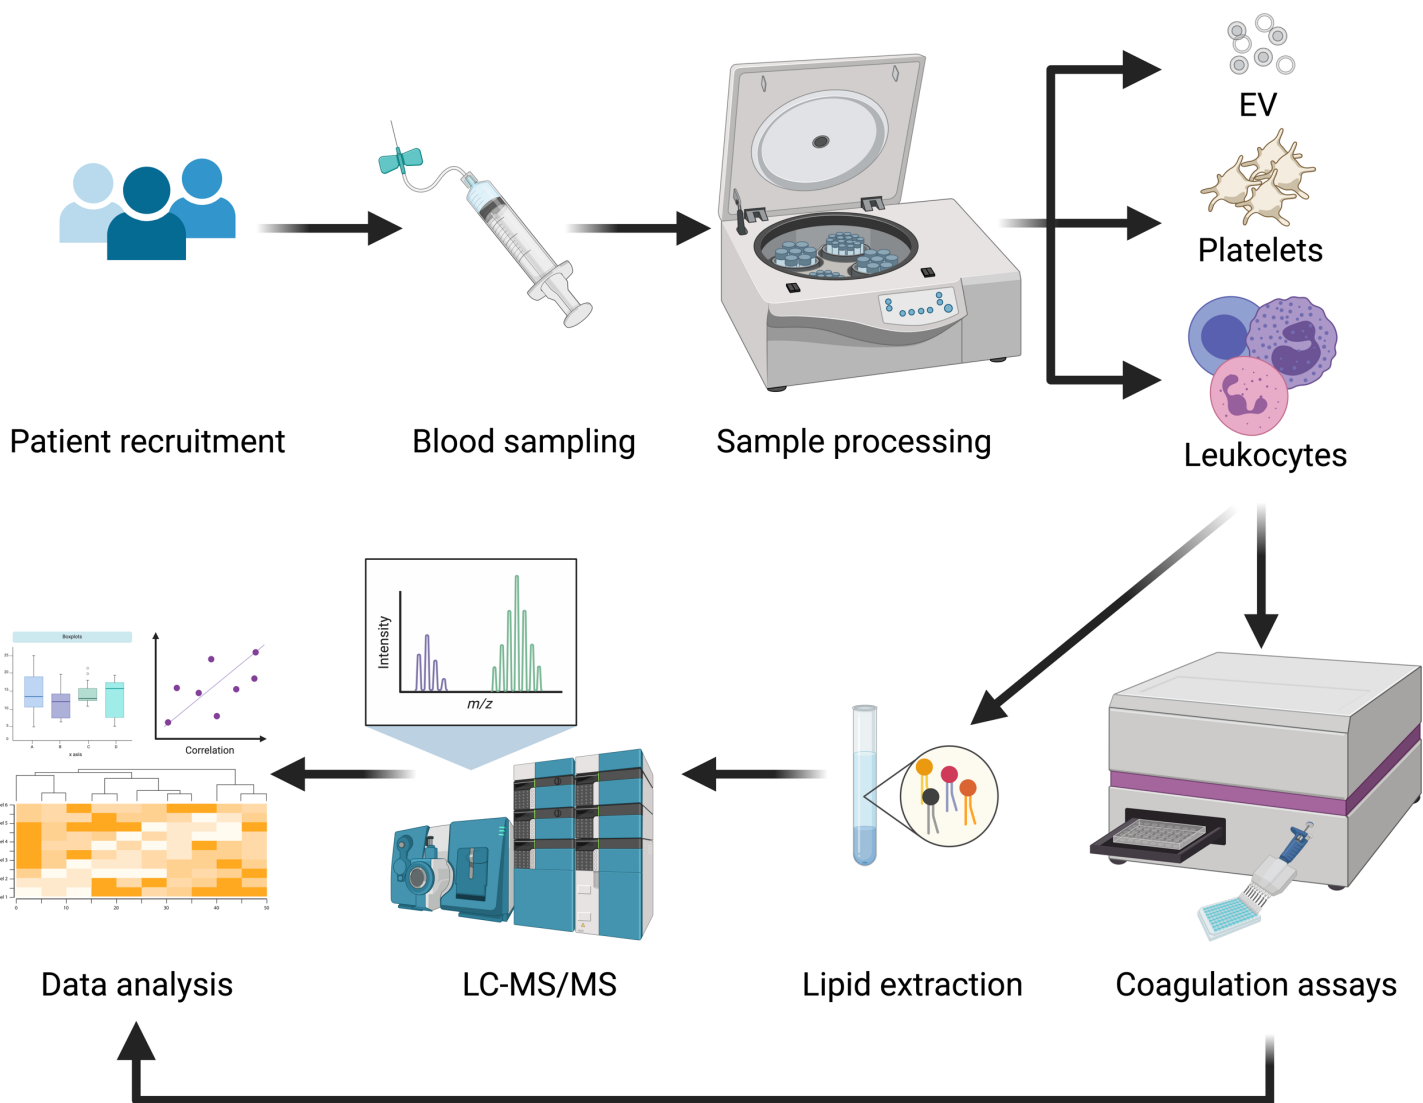

**Figure S1**

**Step 1:**  
Add source of phospholipid (washed cells)

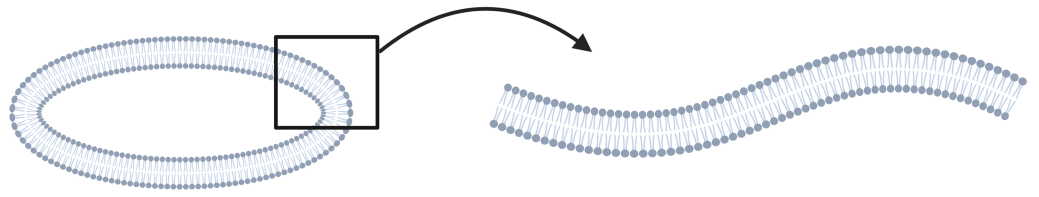

**Step 2:**  
Add mixture of FXa, FVa, FII (prothrombin) and calcium

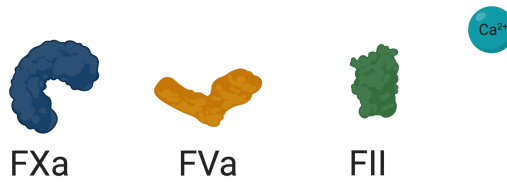

**Step 3:**  
Allow prothrombinase (FXa:FVa) reaction to proceed for 5 min to form FIIa (thrombin)

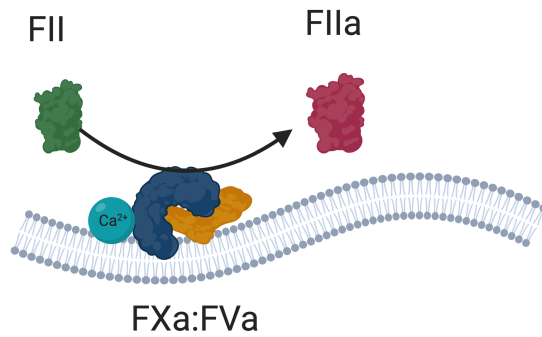

**Step 4:**  
Stop reaction after 5 minutes with EDTA

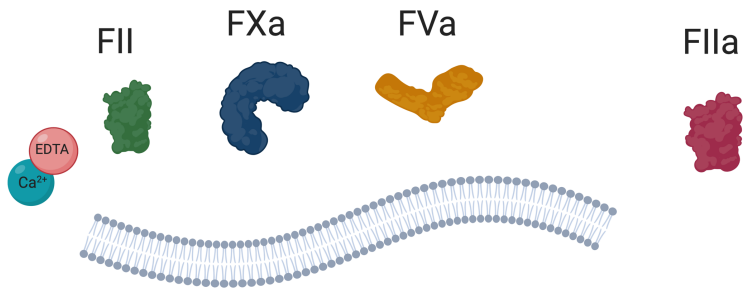

**Step 5:**  
Quantify amount of FIIa (thrombin) made using S-2238 chromogenic substrate absorbance in a plate reader

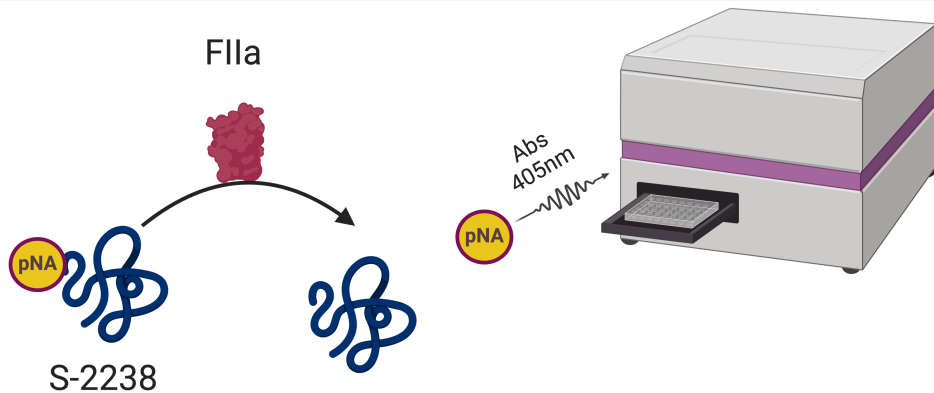

**Figure S2**

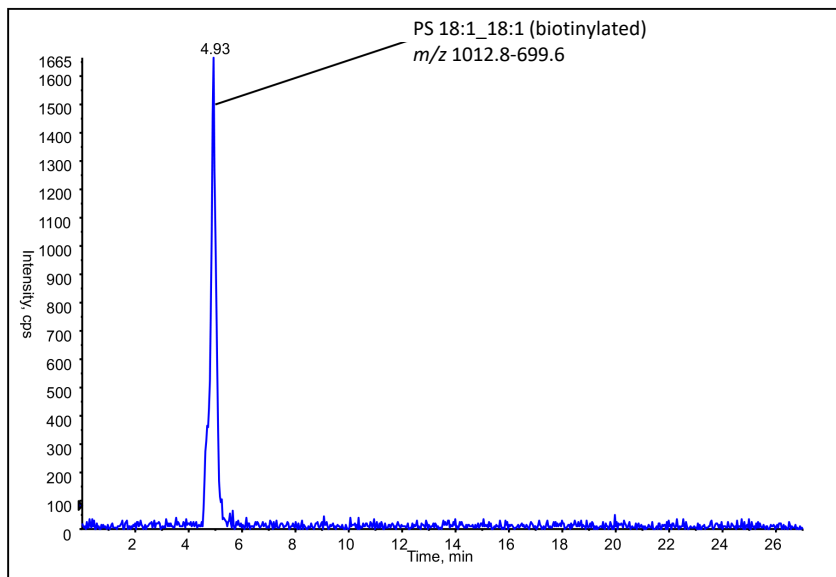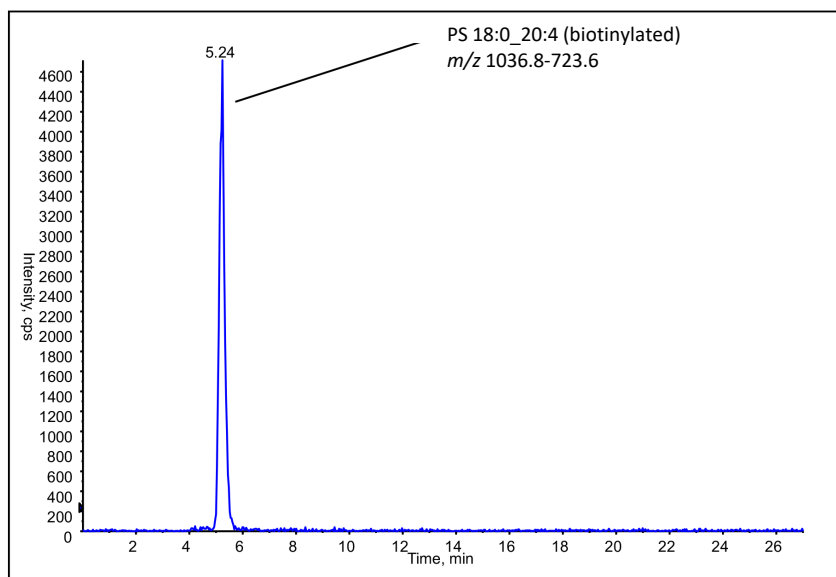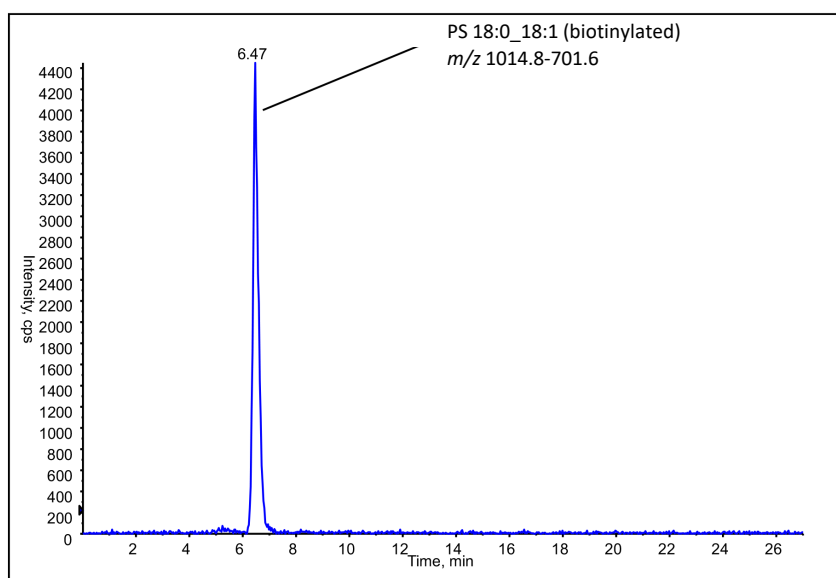

Figure S3



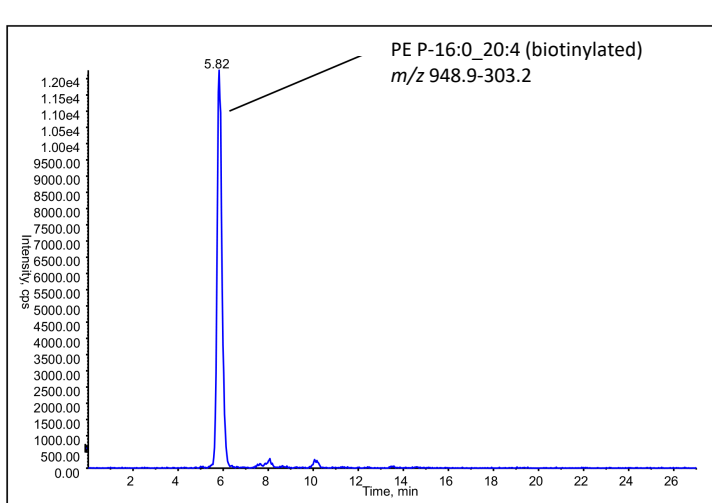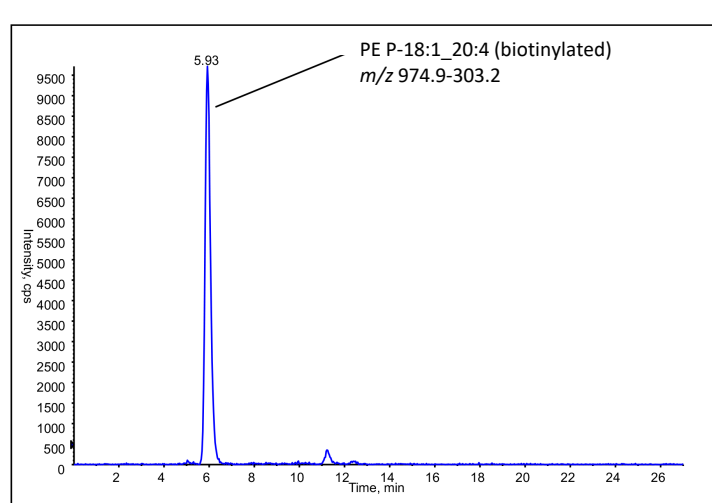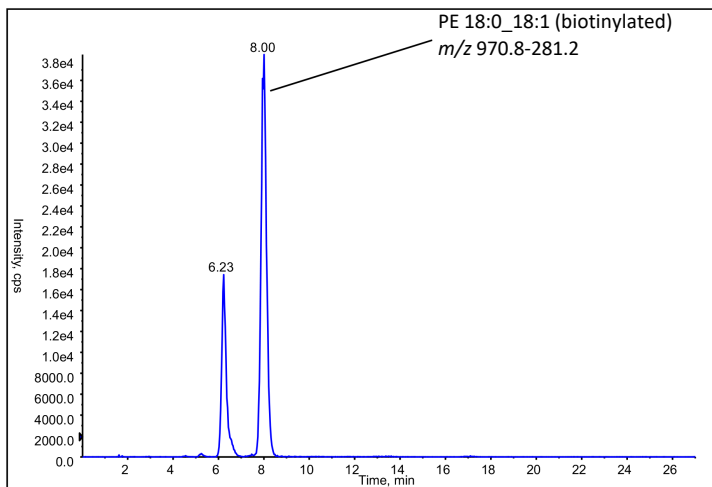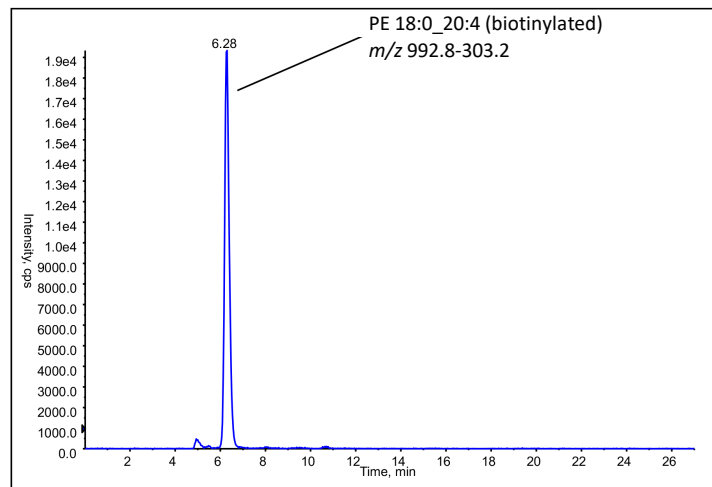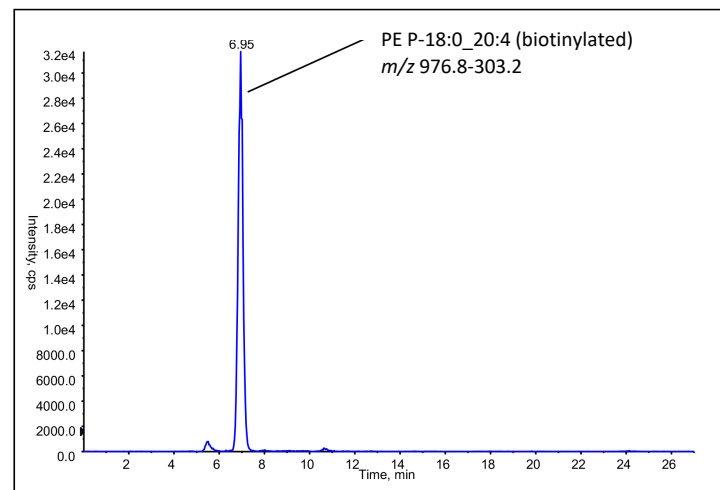

Figure S4

**A**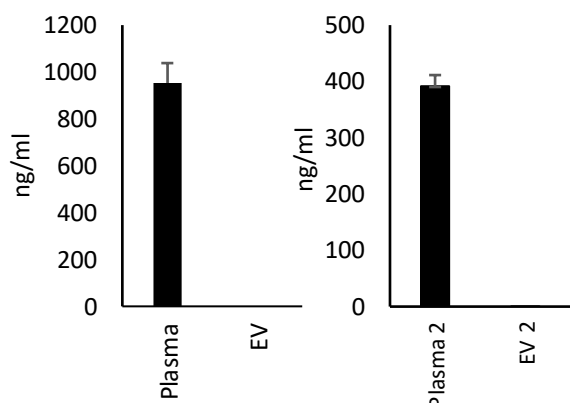**B**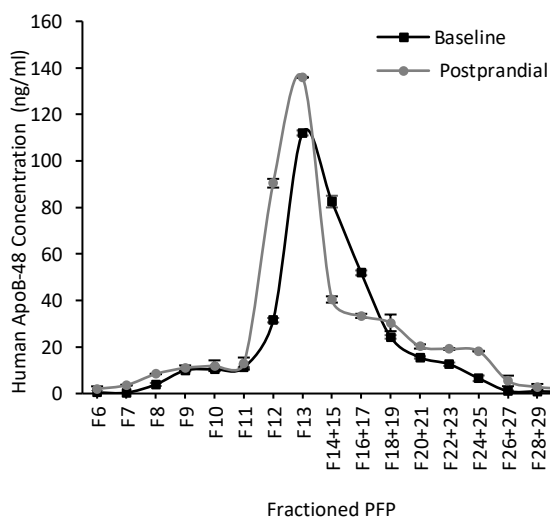**C**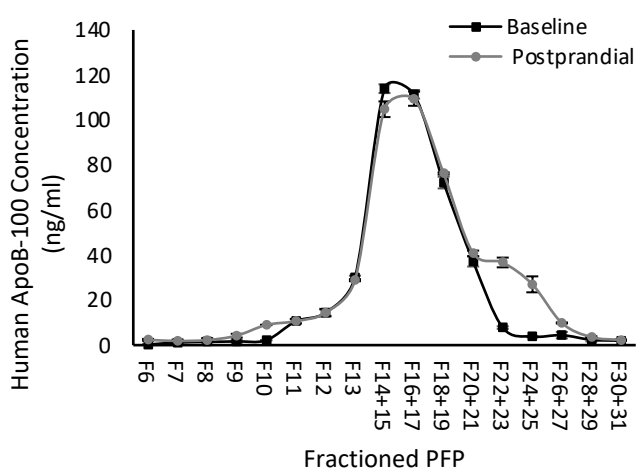**D**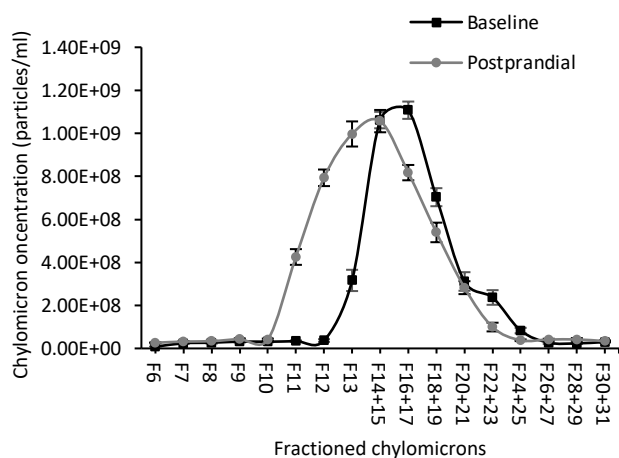**E**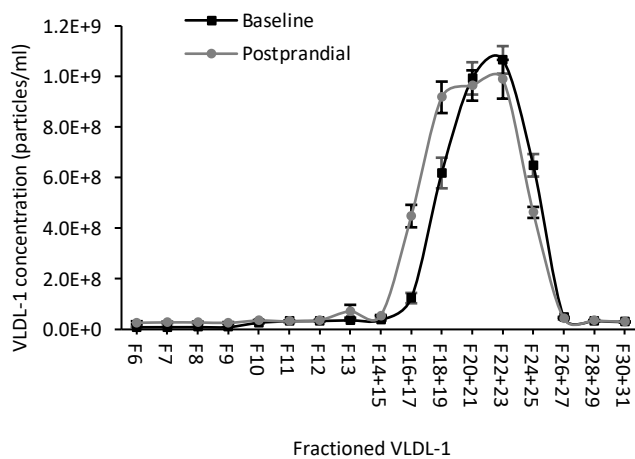**F**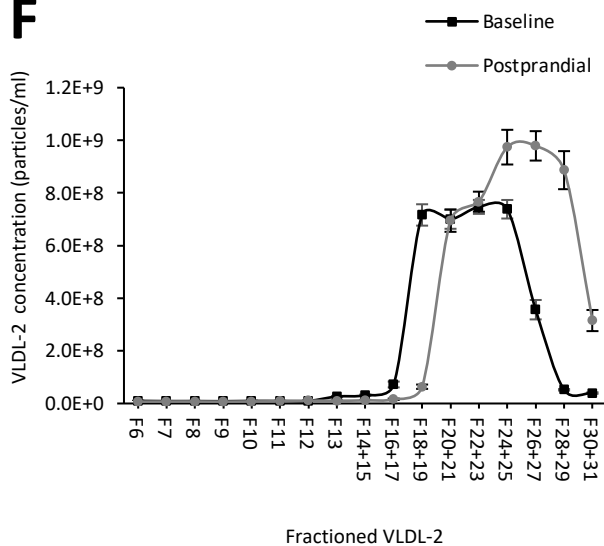**Figure S5**

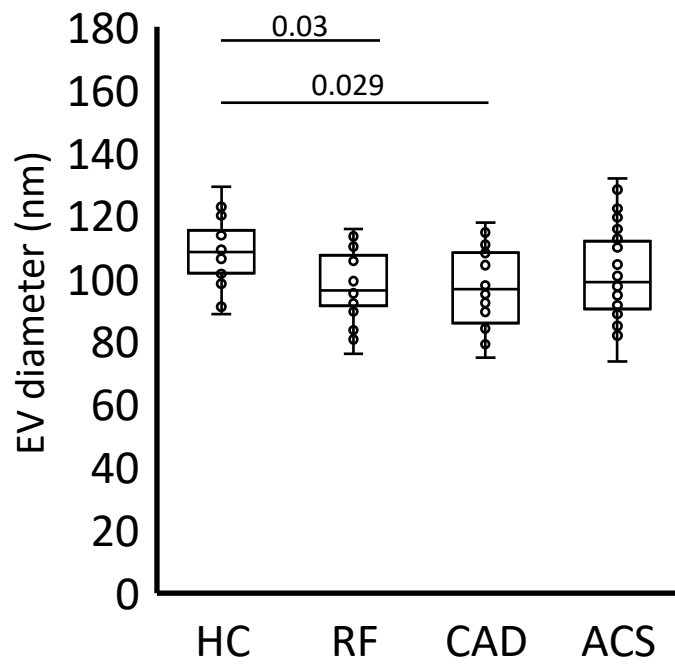

Figure S6

# A – externalized aPL in EV samples

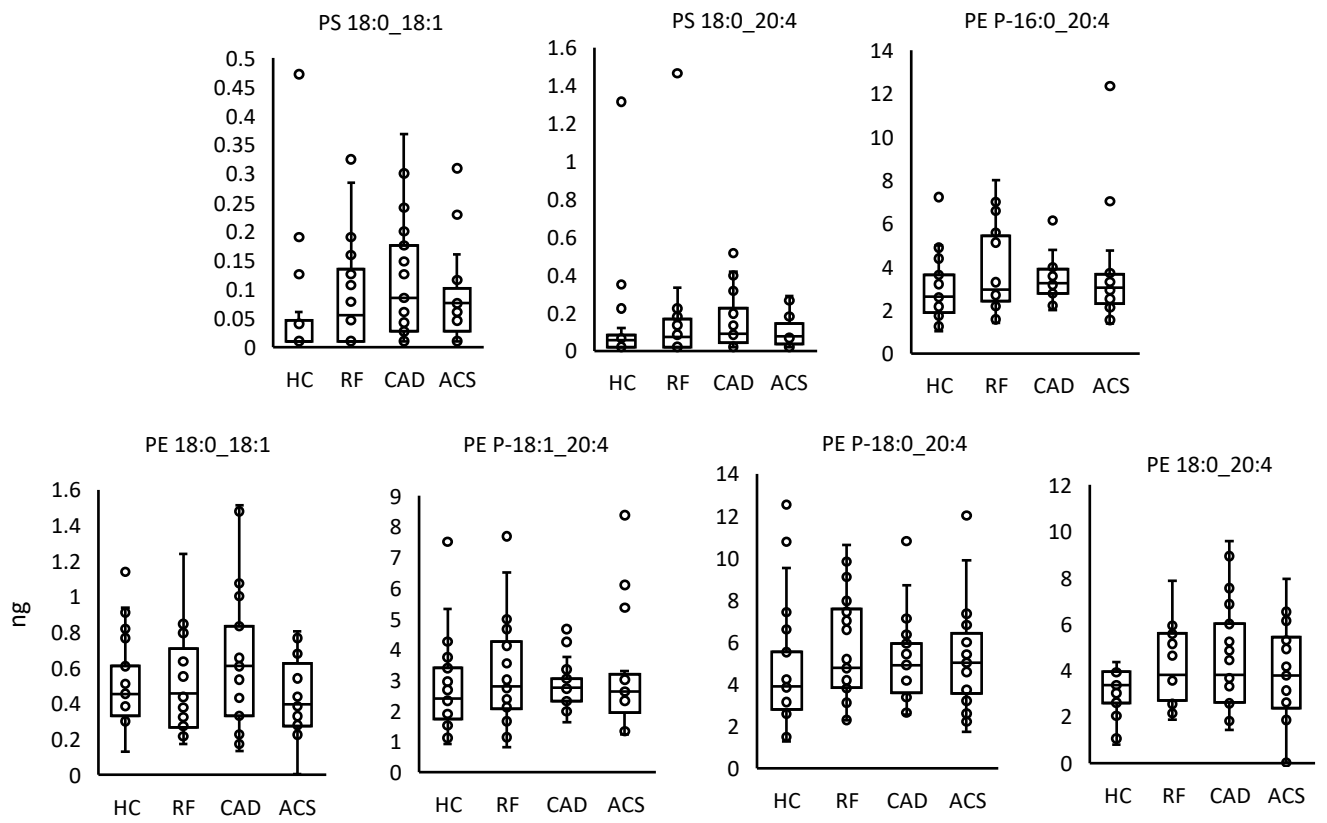

# B – total aPL in EV samples

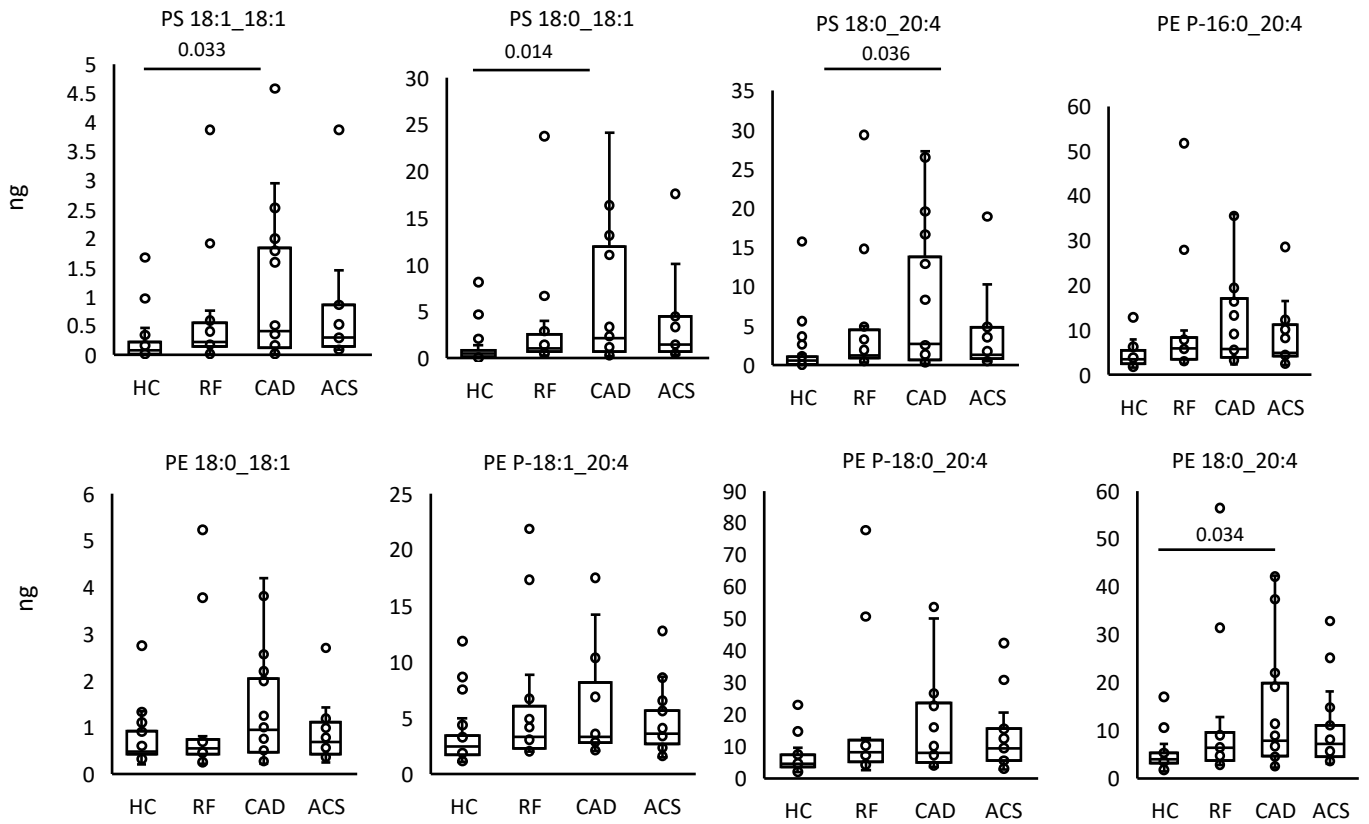

Figure S7

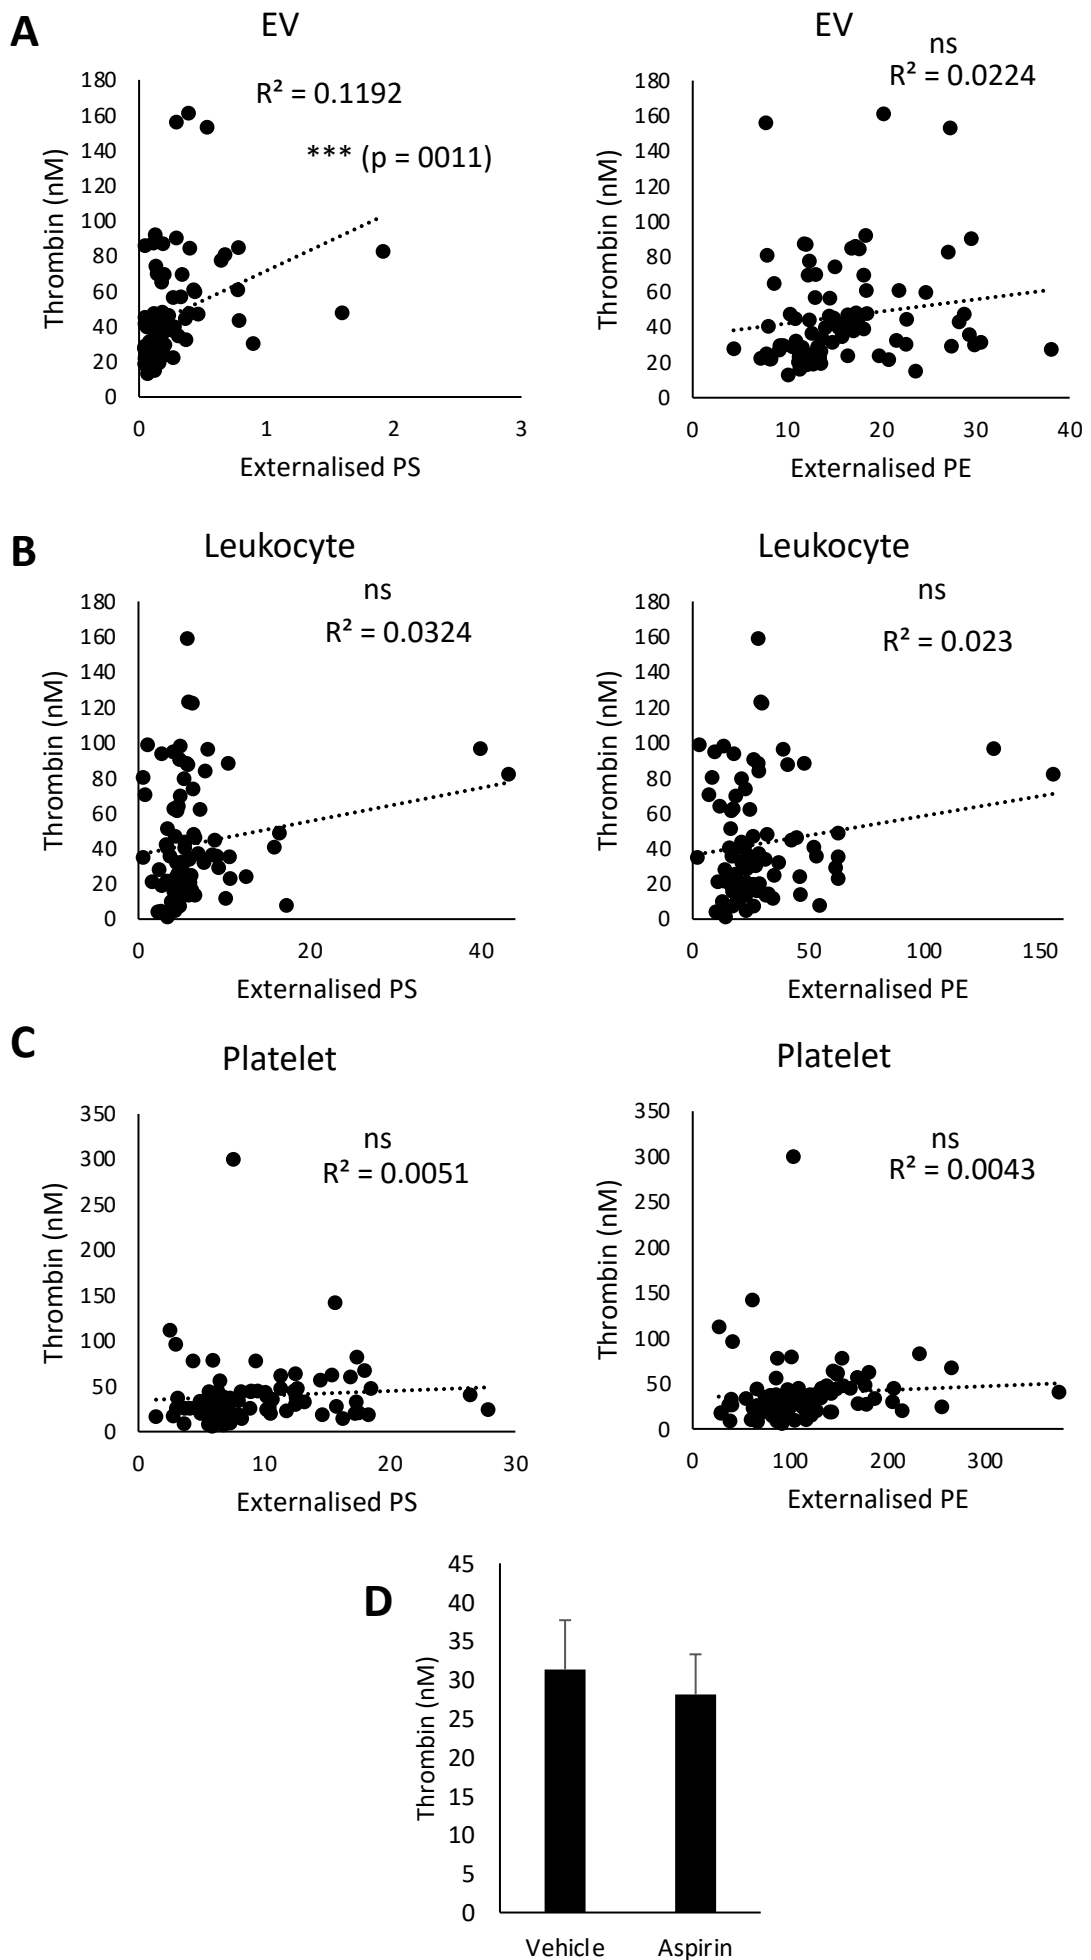

Figure S8

**A**

Externalized aPL in leukocytes ( $8 \times 10^5$  cells)

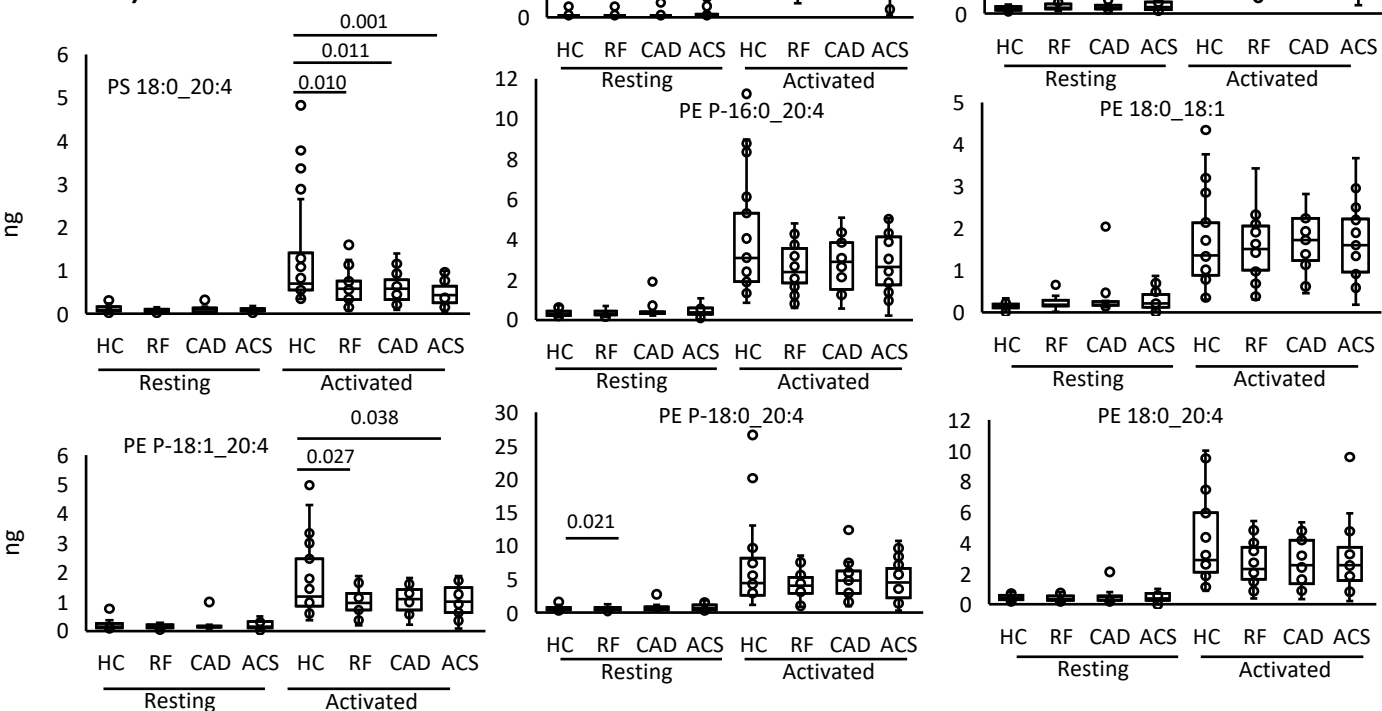**B**

Total aPL in leukocytes ( $8 \times 10^5$  cells)

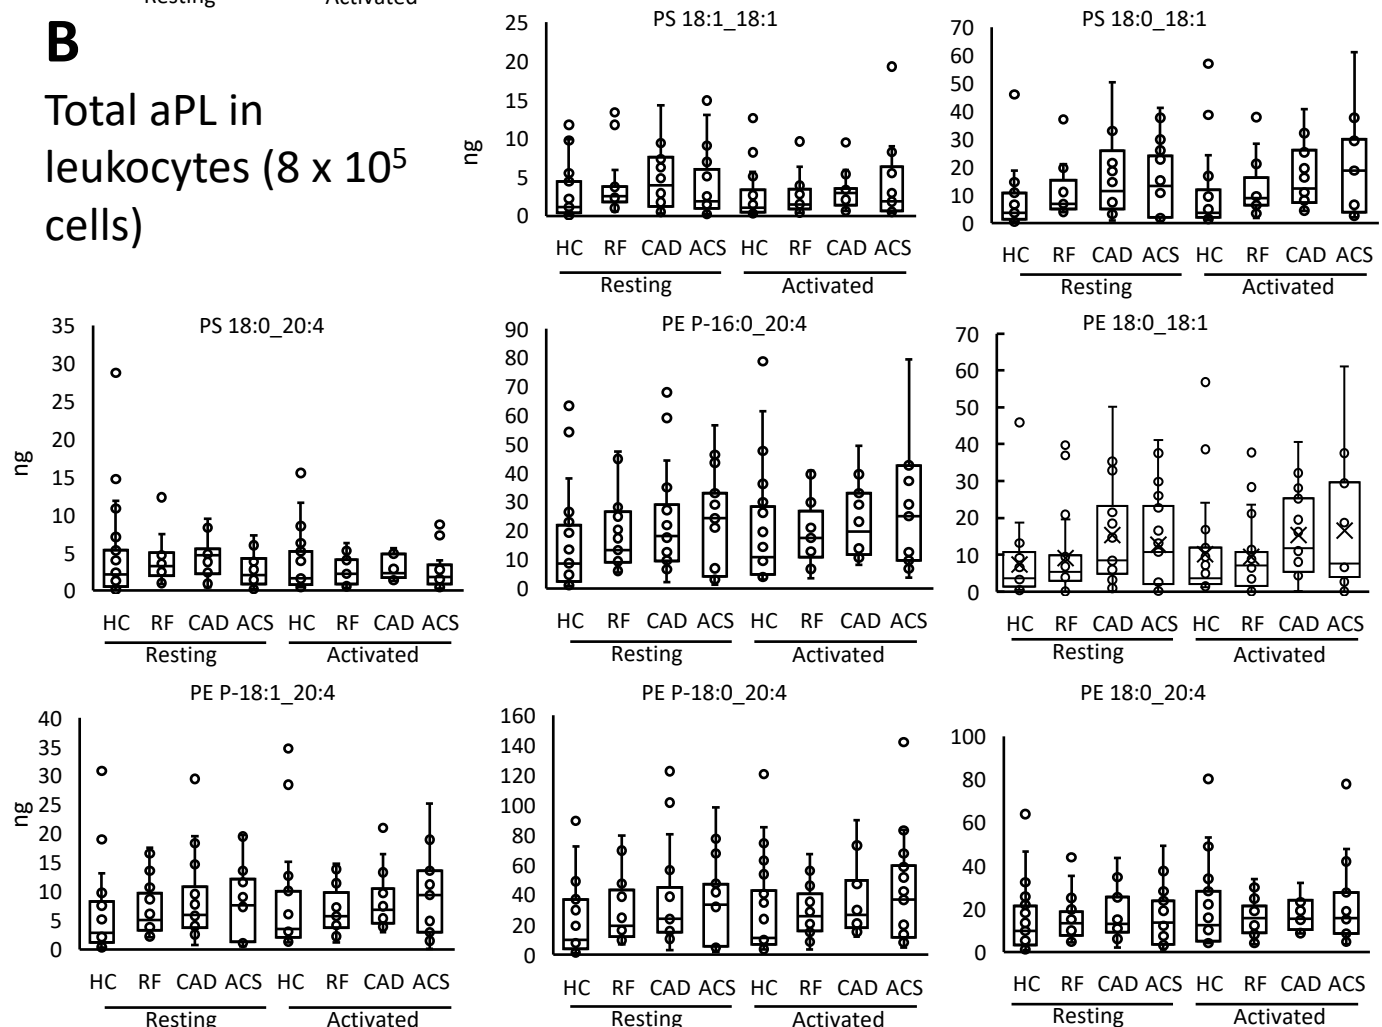

**Figure S9**

# A

## Externalized aPL in platelets ( $4 \times 10^7$ cells)

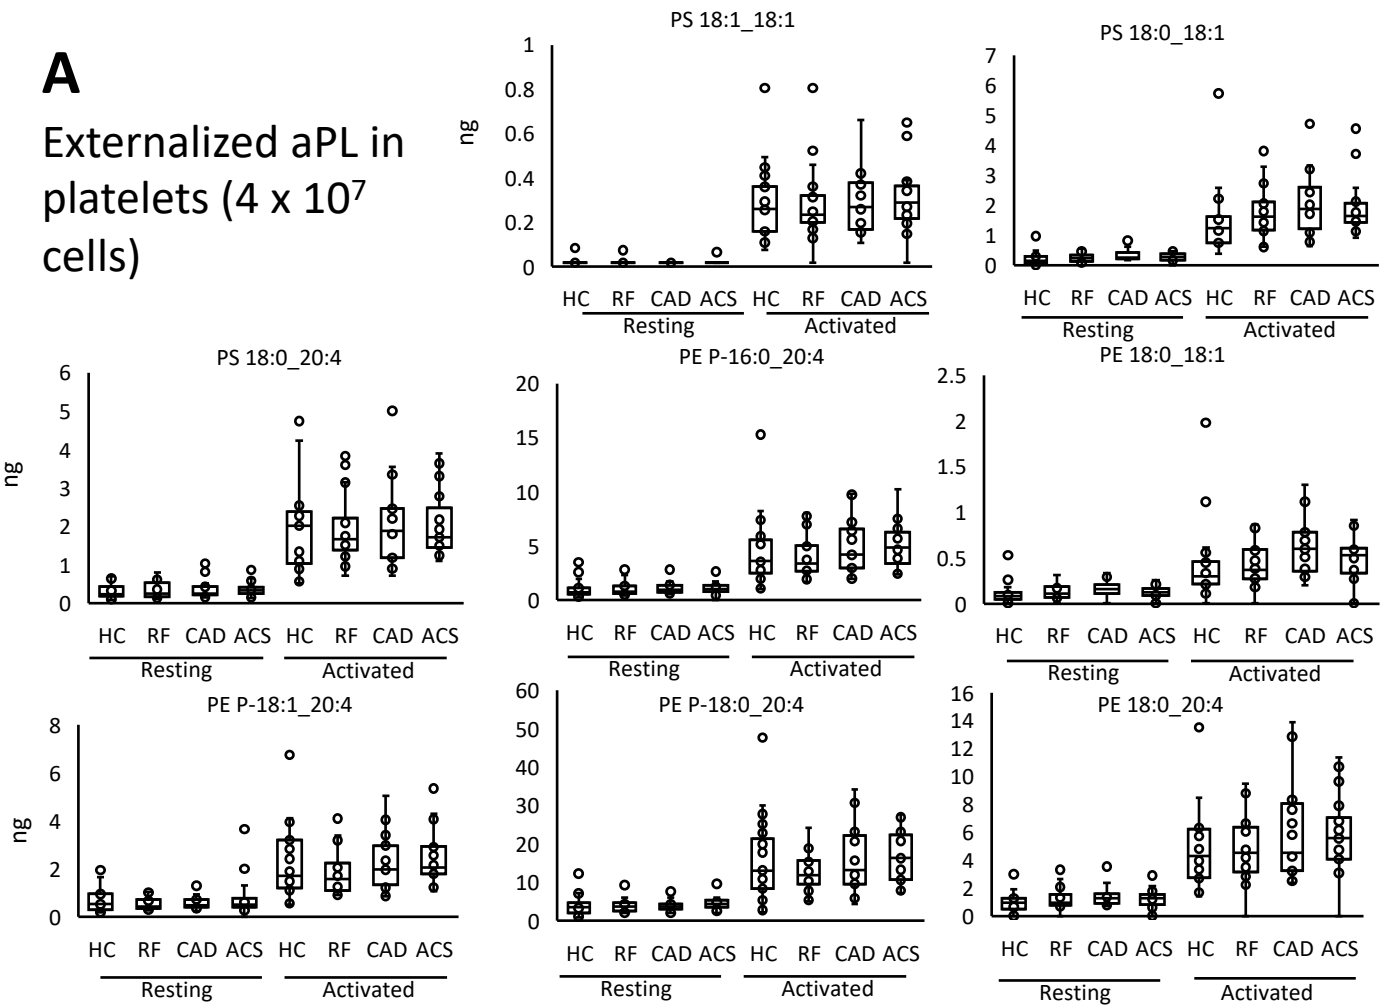

# B

## Total aPL in platelets ( $4 \times 10^7$ cells)

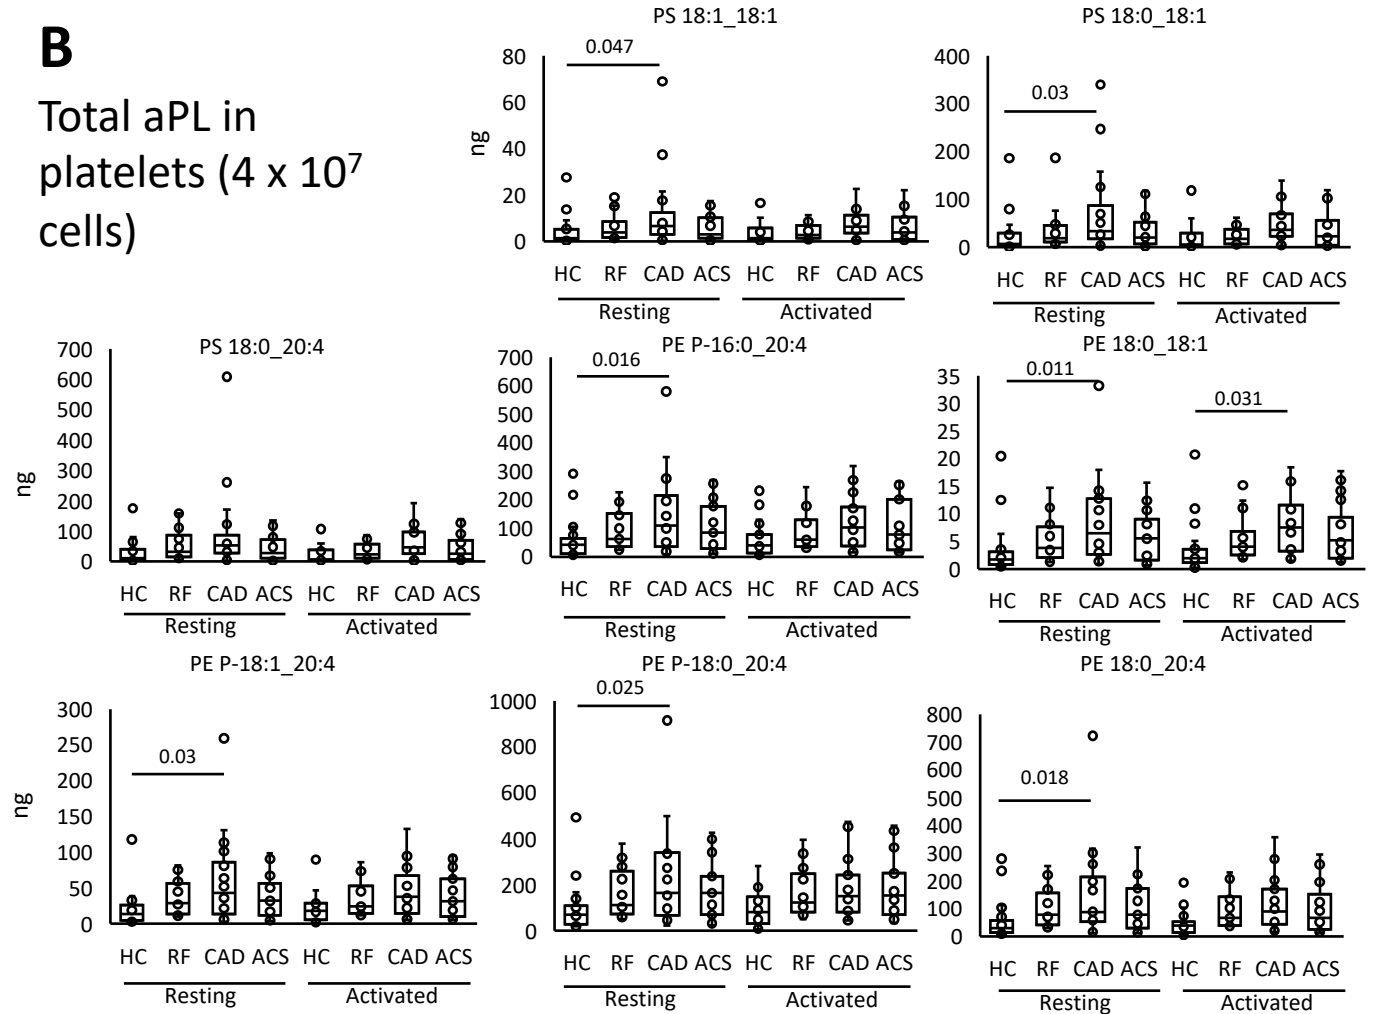

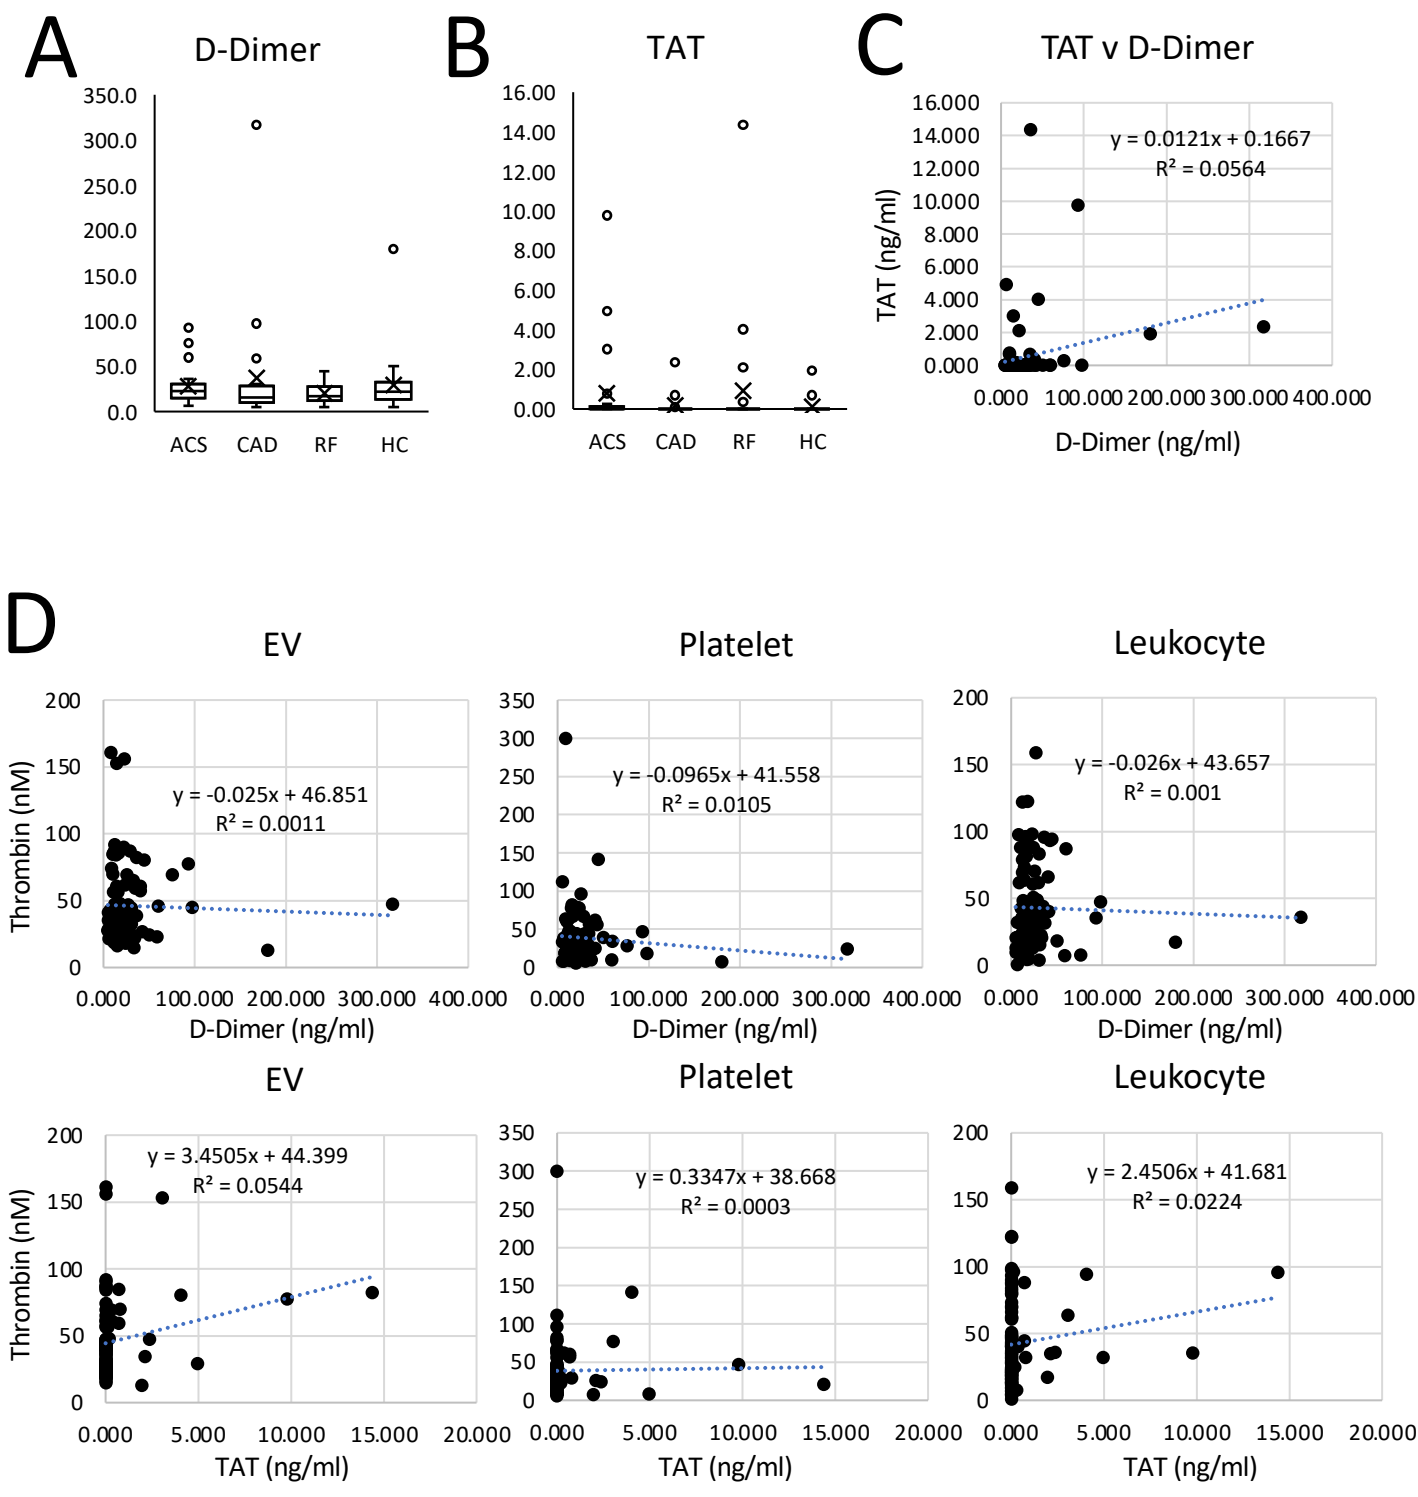

Figure S11



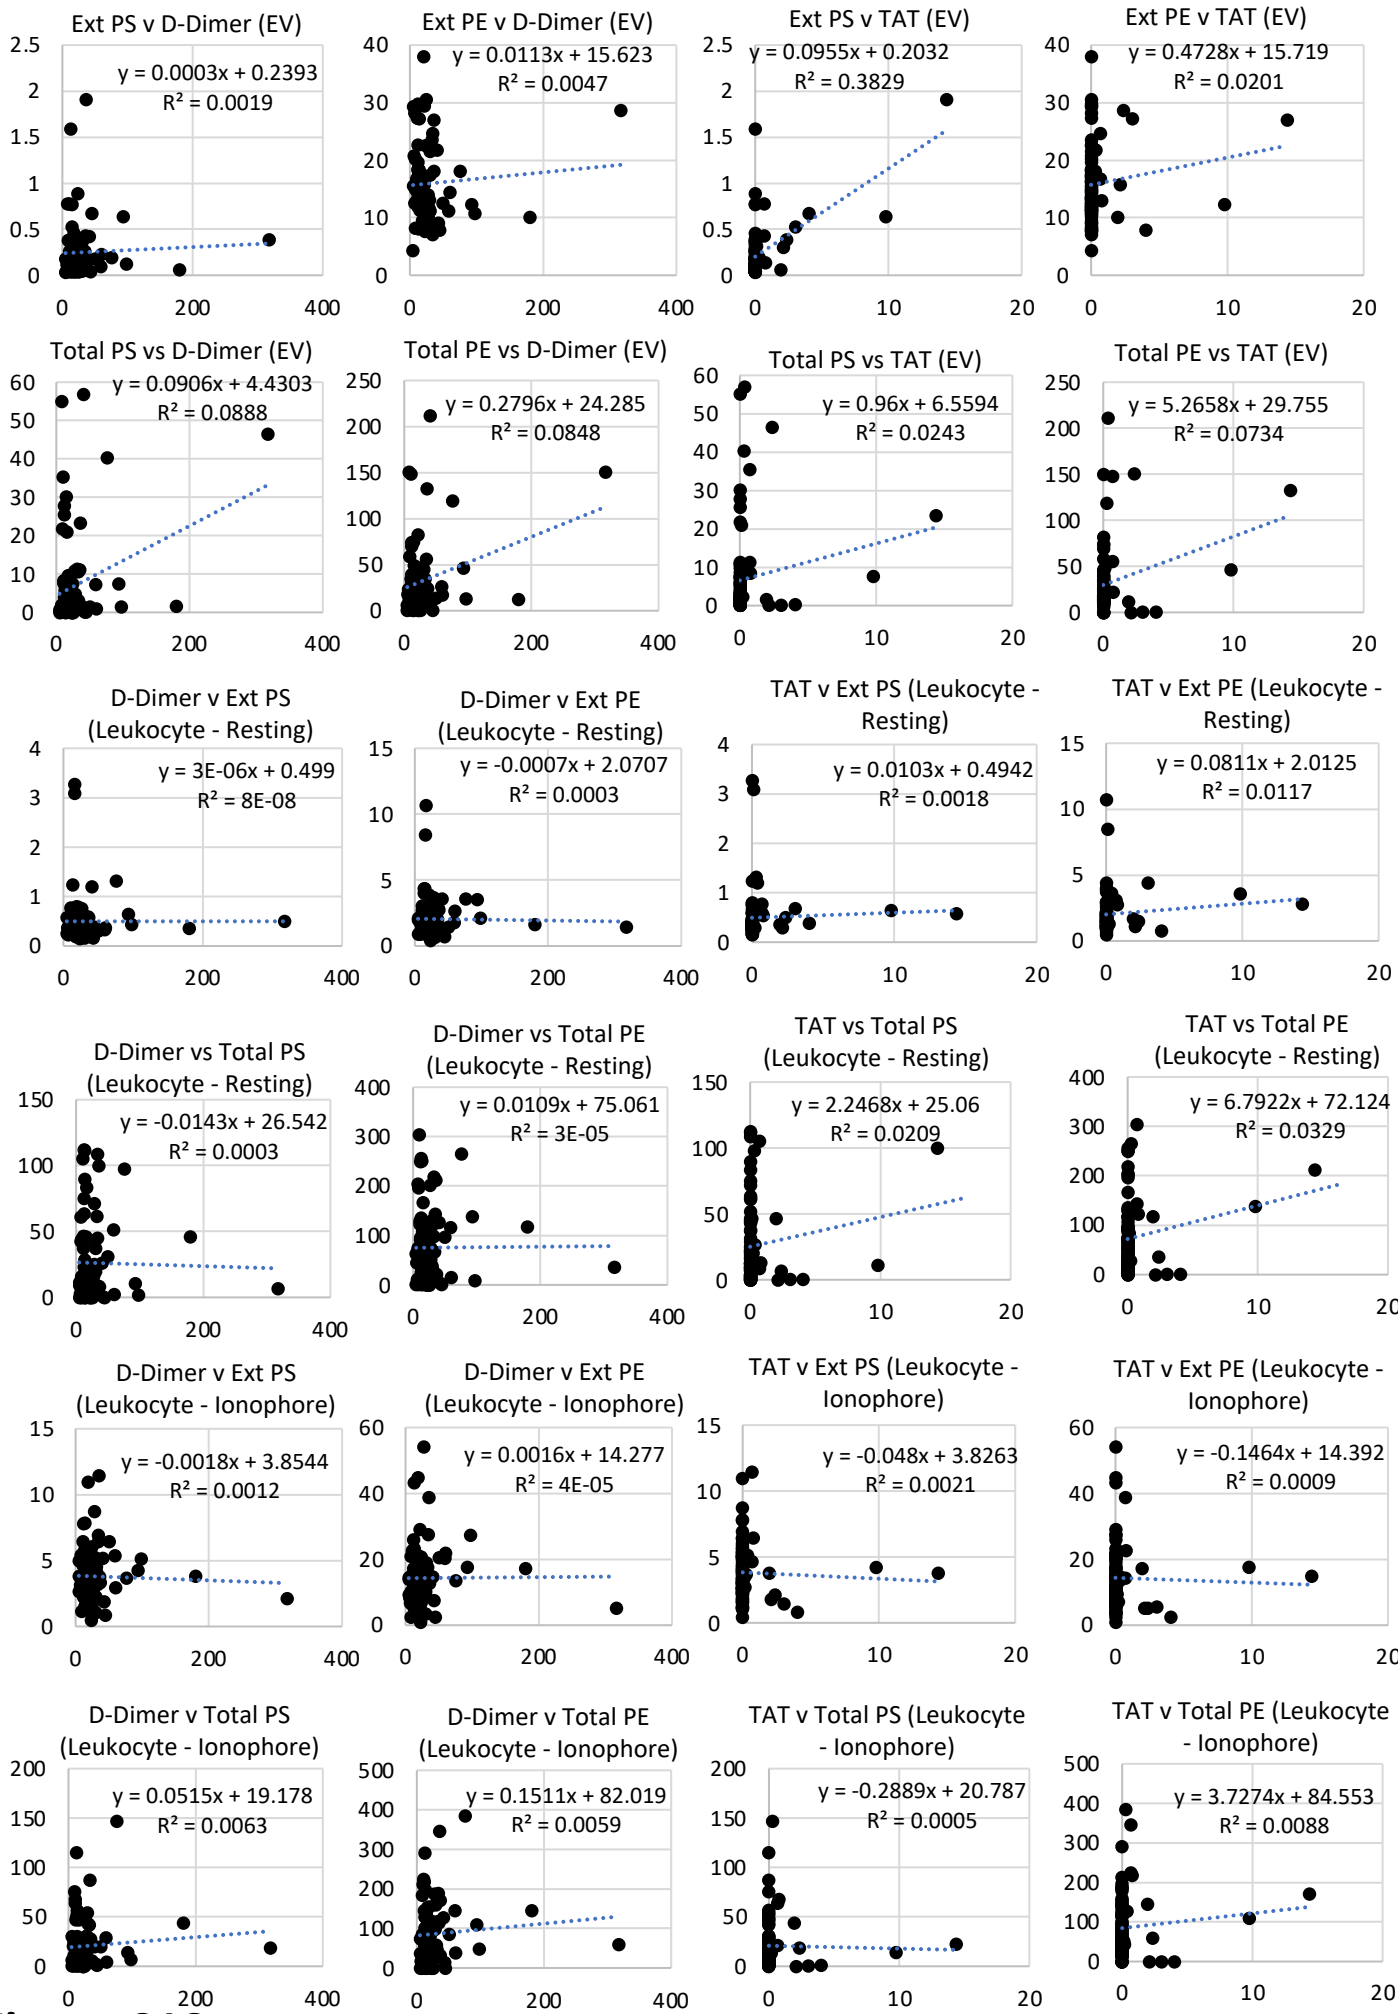

**Figure S12**

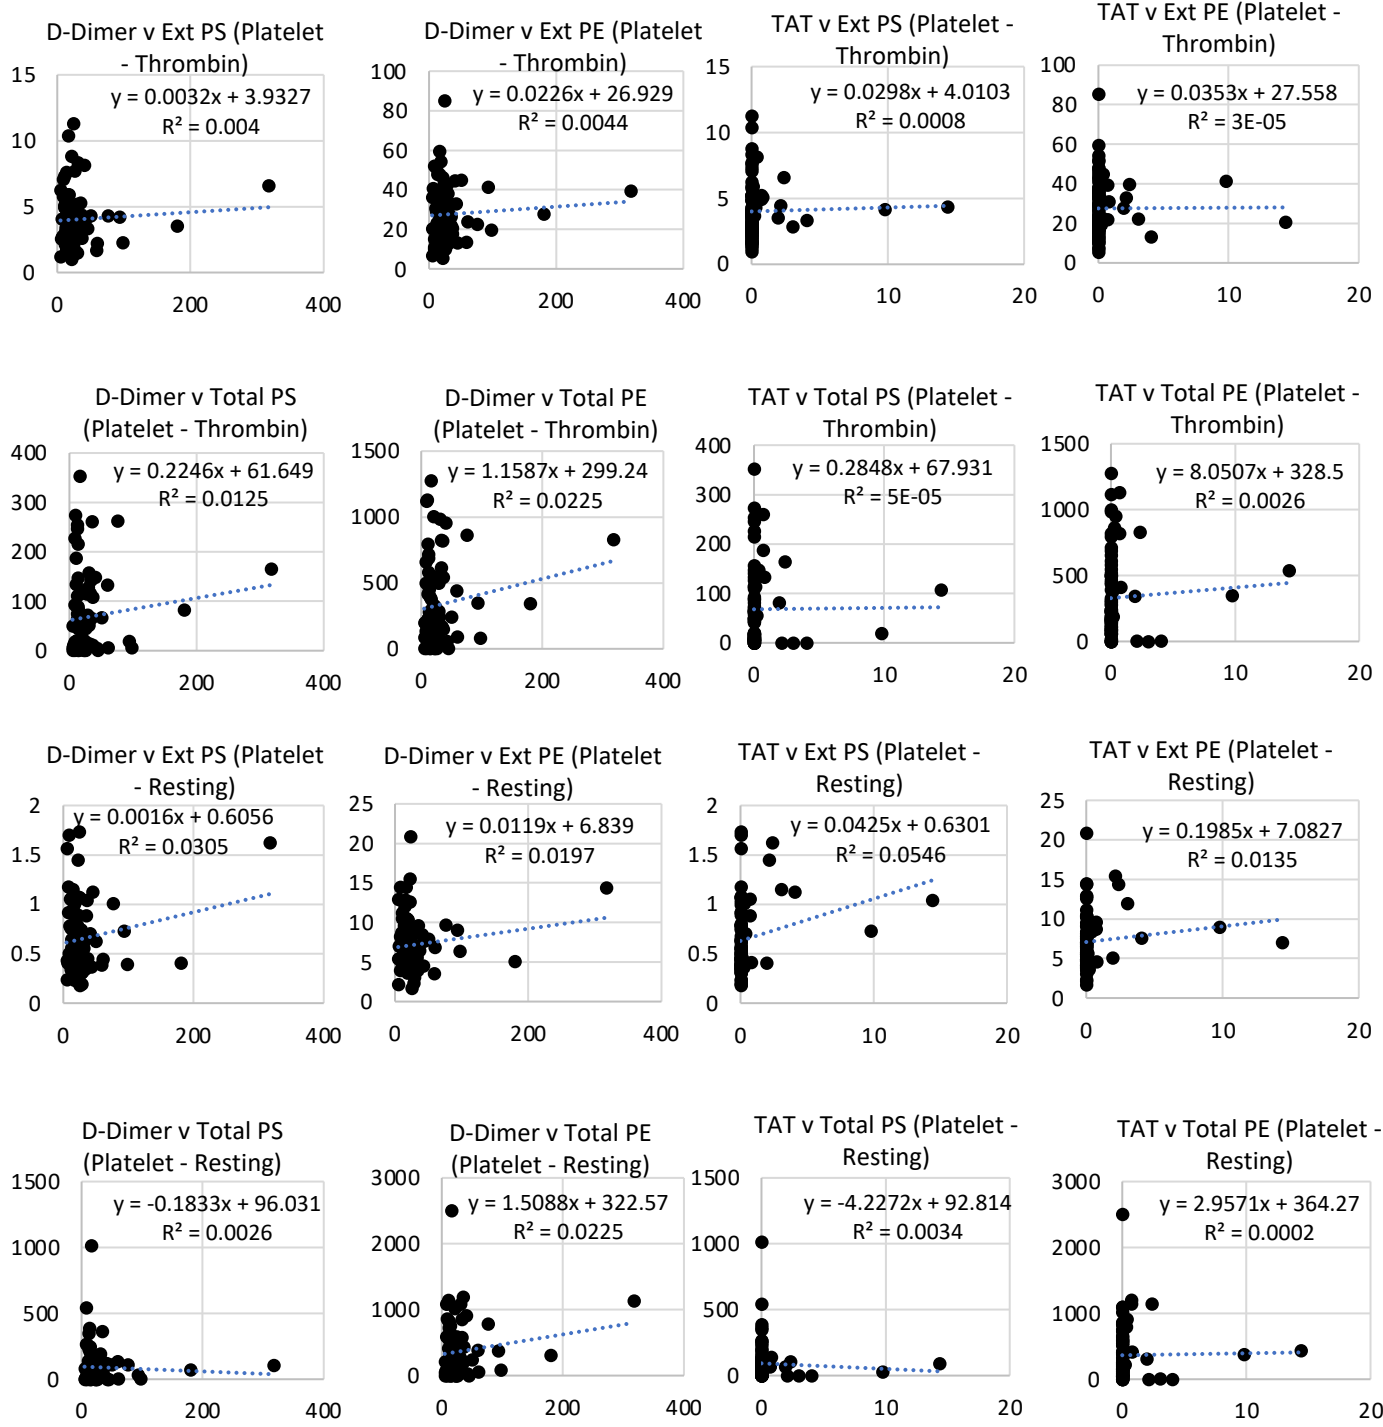

**Figure S13**

## Major Resources Table

In order to allow validation and replication of experiments, all essential research materials listed in the Methods should be included in the Major Resources Table below. Authors are encouraged to use public repositories for protocols, data, code, and other materials and provide persistent identifiers and/or links to repositories when available. Authors may add or delete rows as needed.

### Animals (in vivo studies)

| Species | Vendor or Source | Background Strain | Sex | Persistent ID / URL |
|---------|------------------|-------------------|-----|---------------------|
| NA      |                  |                   |     |                     |
|         |                  |                   |     |                     |
|         |                  |                   |     |                     |

### Genetically Modified Animals

|                 | Species | Vendor or Source | Background Strain | Other Information | Persistent ID / URL |
|-----------------|---------|------------------|-------------------|-------------------|---------------------|
| Parent - Male   |         |                  |                   |                   |                     |
| Parent - Female |         |                  |                   |                   |                     |

### Antibodies

| Target antigen | Vendor or Source | Catalog # | Working concentration | Lot # (preferred but not required) | Persistent ID / URL |
|----------------|------------------|-----------|-----------------------|------------------------------------|---------------------|
| NA             |                  |           |                       |                                    |                     |
|                |                  |           |                       |                                    |                     |

### DNA/cDNA Clones

| Clone Name | Sequence | Source / Repository | Persistent ID / URL |
|------------|----------|---------------------|---------------------|
| NA         |          |                     |                     |
|            |          |                     |                     |
|            |          |                     |                     |

### Cultured Cells

| Name | Vendor or Source | Sex (F, M, or unknown) | Persistent ID / URL |
|------|------------------|------------------------|---------------------|
| NA   |                  |                        |                     |
|      |                  |                        |                     |
|      |                  |                        |                     |

### Data & Code Availability

| Description | Source / Repository | Persistent ID / URL |
|-------------|---------------------|---------------------|
| NA          |                     |                     |
|             |                     |                     |
|             |                     |                     |

### Other

| Description | Source / Repository | Persistent ID / URL |
|-------------|---------------------|---------------------|
| NA          |                     |                     |
|             |                     |                     |
|             |                     |                     |

## ARRIVE GUIDELINES

The ARRIVE guidelines (<https://arriveguidelines.org/>) are a checklist of recommendations to improve the reporting of research involving animals. Key elements of the study design should be included below to better enable readers to scrutinize the research adequately, evaluate its methodological rigor, and reproduce the methods or findings.

### Study Design

| Groups             | Sex | Age | Number (prior to experiment) | Number (after termination) | Littermates (Yes/No) | Other description |
|--------------------|-----|-----|------------------------------|----------------------------|----------------------|-------------------|
| Group 1 (Control)  |     |     |                              |                            |                      |                   |
| Group 2            |     |     |                              |                            |                      |                   |
| Add more if needed |     |     |                              |                            |                      |                   |

**Sample Size:** Please explain how the sample size was decided Please provide details of any a *prior* sample size calculation, if done.

### Inclusion Criteria

### Exclusion Criteria

### Randomization

### Blinding
